# Supplementary material for: Area of Wharton's jelly as an estimate of the thickness of the umbilical cord and its relationship with estimated fetal weight
Source: Springer Nature journal article supplement (doi:10.1186/1742-4755-8-32), 2011-11-04
Supplement: 12978_2011_129_MOESM1_ESM.pdf [file 12978_2011_129_MOESM1_ESM.pdf]

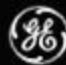

RAB 4-8L/Obstetric

MI 0.8

CDE - Diagnostico por Imagem

32554-07-03-29-38

4.3/11.9cm / 47Hz

TIs 0.1

29.03.2007

18:22:21

GE

2.+3. Trim.

Har-low

Pwr 100 %

Gn -2

C7 / M7

P4 / E2

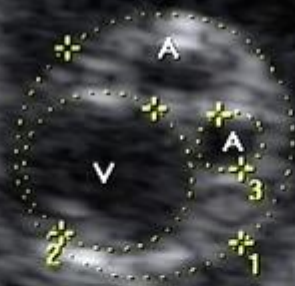

1 D1 1.45cm  
D2 1.55cm  
A 1.76cm<sup>2</sup>  
C 4.70cm

2 D1 0.87cm  
D2 0.93cm  
A 0.63cm<sup>2</sup>  
C 2.82cm

3 D1 0.33cm  
D2 0.36cm  
A 0.09cm<sup>2</sup>  
C 1.09cm
